# 1 **Title: A direct proof that sole actin dynamics drive membrane**

## 2 **deformations**

3

4 Camille Simon<sup>†1,2</sup>, Rémy Kusters<sup>†1,2</sup>, Valentina Caorsi<sup>†1,2</sup>, Antoine Allard<sup>1,2,3</sup>, Majdouline  
5 Abou-Ghali<sup>1,2</sup>, John Manzi<sup>1,2</sup>, Aurélie Di Cicco<sup>1,2</sup>, Daniel Lévy<sup>1,2</sup>, Martin Lenz<sup>4</sup>, Jean-  
6 François Joanny<sup>1,2,5</sup>, Clément Campillo<sup>3</sup>, Julie Plastino<sup>1,2</sup>, Pierre Sens<sup>1,2&</sup>, Cécile Sykes<sup>1,2&</sup>

7

8 <sup>†</sup>These authors contributed equally to this work.

9 <sup>&</sup>These authors contributed equally to this work.

10

11 **Abstract:** Cell membrane deformations are crucial for proper cell function. Specialized  
12 protein assemblies initiate inward or outward membrane deformations that turn into, for  
13 example, filopodia or endocytic intermediates. Actin dynamics and actin-binding proteins are  
14 involved in this process, although their detailed role remains controversial. We show here  
15 that a dynamic, branched actin network is sufficient, in absence of any membrane-associated  
16 proteins, to initiate both inward and outward membrane deformation. With actin  
17 polymerization triggered at the membrane of liposomes, we produce inward filopodia-like  
18 structures at low tension, while outward endocytosis-like structures are robustly generated  
19 regardless of tension. Our results are reminiscent of endocytosis in mammalian cells, where  
20 actin polymerization forces are required when membrane tension is increased, and in yeast,  
21 where they are always required to overcome the opposing turgor pressure. By combining  
22 experimental observations with physical modeling, we propose a mechanism for actin-driven  
23 endocytosis under high tension or high pressure conditions.

<sup>1</sup>Laboratoire Physico Chimie Curie, Institut Curie, PSL Research University, CNRS UMR168, 75005, Paris, France. <sup>2</sup>Sorbonne Universités, UPMC Univ Paris 06, 75005, Paris, France. <sup>3</sup>LAMBE, Université Evry, CNRS, CEA, Université Paris-Saclay, Evry F-91025, France. <sup>4</sup>LPTMS, CNRS, Univ. Paris-Sud, Université Paris-Saclay, 91405 Orsay, France. <sup>5</sup>ESPCI-Paris, 10 rue Vauquelin, 75005, Paris, France.

24 Many cell functions rely on the ability of cells to change their shape. The deformation of the  
25 cell membrane is produced by the activity of various proteins that curve the membrane  
26 inwards or outwards, by exerting pulling and pushing forces or by imposing membrane  
27 curvature via structural effects. Membrane invagination (or inward deformation of the cell  
28 membrane) can be initiated by specific proteins, such as clathrin, which coat the membrane  
29 and impose geometrical constraints that bend the membrane inwards. In this view, the action  
30 of the actin cytoskeleton, a filamentous network that forms at the membrane, is crucial only  
31 at a later stage for membrane elongation. Nevertheless, impressive correlation methods  
32 revealed unambiguously that, in yeast, membrane bending is not triggered by the presence of  
33 coat proteins, but by a dynamic actin network formed at the membrane through the Arp2/3  
34 complex branching agent <sup>1-3</sup>. In mammalian cells, clathrin-mediated endocytosis requires the  
35 involvement of actin if the plasma membrane is tense, *e.g.* following osmotic swelling or  
36 mechanical stretching <sup>4</sup>. However, the exact mechanism of membrane deformation in this  
37 process is still poorly understood. Strikingly, the same type of branched actin network is able  
38 to bend the membrane the other way in dendritic filopodia, outward-pointing membrane  
39 deformations that precede the formation of dendritic spine in neurons <sup>5</sup>. Dendritic filopodia  
40 appear different from conventional filopodia where actin filaments are visibly parallel. The  
41 ability of a branched actin network to produce a filopodia-like membrane deformation has  
42 never been investigated.

43

44 How the same branched actin structure can be responsible for the initiation of filopodia,  
45 which are outward-pointing membrane deformations, as well as endocytic cups that deform  
46 the membrane inward, is what we want to address in this paper. Such a question is difficult to  
47 investigate in cells that contain redundant mechanisms for cell deformation. Actin dynamics  
48 triggered at a liposome membrane provide a control on experimental parameters such as

49 membrane composition, curvature and tension, and allow the specific role of actin dynamics  
50 to be addressed. We evidence that the same branched actin network is able to produce both  
51 endocytosis-like and filopodia-like deformations. With a theoretical model, we predict under  
52 which conditions the stress exerted on the membrane might lead to inward and/or outward  
53 pointing membrane deformations. Combining experiments and theory allows us to decipher  
54 how the interplay between membrane tension and actin dynamics produces inward or  
55 outward membrane deformations.

56

### 57 **Membrane deformations:tubes and spikes**

58 Liposomes covered with an activator of the Arp2/3 complex, SpVCA, are placed in a mixture  
59 containing monomeric actin, profilin, the Arp2/3 complex and capping protein (CP) in order  
60 to grow a branched actin network at their surface (Materials and Methods and Fig. 1A).

61 Strikingly, imaging the membrane of liposomes in the presence of a growing actin network  
62 reveals that the liposome surface is not smooth, but instead shows a rugged profile. Indeed,  
63 membrane tubes, hereafter called "tubes", are observed to radiate from the liposome surface  
64 and extend into the actin network (Fig. 1B), even when comet formation has occurred <sup>6,7</sup>  
65 (Supplementary Fig. 1). Interestingly, some liposomes display another type of membrane  
66 deformation, characterized by a conical shape that points towards the liposome interior,  
67 hereafter referred to as "spikes" (Fig. 1B). Some of the liposomes carry both tubes and spikes,  
68 while others display neither, despite the presence of an actin network at the membrane (Fig.  
69 1B).

70 We now address the role of membrane tension on the appearance of tubes and spikes. Under  
71 conditions of normal osmotic pressure (200 mOsm), 63.0% of liposomes display tubes only,  
72 2.3% show spikes only, while 6.1% of liposomes have a mix of both, and 28.6% have neither  
73 (Fig. 1C). To examine how membrane tension affects the occurrence of tubes and spikes,

74 liposomes are deflated by increasing the osmotic pressure of the working buffer to 400  
75 mOsm. On the one hand, a huge increase in the number of liposomes displaying spikes is  
76 observed when membrane tension is lowered in deflated liposomes. Indeed 65.0% of deflated  
77 liposomes display spikes (with or without tubes), compared to 8.4% in non-deflated  
78 conditions (Fig. 1C,  $p < 0.0001$ ). On the other hand, the frequency with which tubes are  
79 observed is essentially unaffected by a change in membrane tension: 69.1% for non-deflated  
80 liposomes compared to 74.8% for deflated liposomes (not significant,  $p = 0.24 > 0.05$ ).  
81 The presence of membrane tubes and spikes clearly correlates with the presence of the actin  
82 network. Indeed, tubes, as well as spikes, disappear where the actin network is destroyed <sup>6</sup>  
83 (Fig. 1, D and E and Materials and Methods). Moreover, the disappearance of tubes correlates  
84 with a change in membrane aspect, from rugged to smooth (Fig. 1D). A possible effect of  
85 membrane curvature induced by our SpVCA attachment is ruled out (Supplementary  
86 Information and Supplementary Fig. 2).

87

## 88 **Characterization of tubes**

89 To assess where new actin monomers are incorporated during tube growth, we initiate actin  
90 assembly with Alexa568-labelled actin (red), and we incorporate new monomers of  
91 Alexa488-labelled actin (green) after 20 minutes (Materials and Methods). As previously  
92 observed for actin networks growing around polystyrene beads <sup>8,9</sup>, new monomers insert at  
93 the liposome surface (Fig. 2A). Strikingly, new (green) monomers are also observed within  
94 the already grown (red) actin network (Fig. 2A), indicating new actin incorporation on the  
95 sides of membrane tubes (evidenced by phase contrast imaging, Fig. 2A, left), where SpVCA,  
96 the activator of actin polymerization, is also present (Fig. 2B).  
97 We find that the average length of the longest tubes increases linearly with network thickness  
98 (Fig. 3, A and B). In fact, tube length roughly equals the thickness of the actin network,

99 independent of the membrane tension (Fig. 3B, slope  $0.89 \pm 0.04$ ). Moreover, we find that  
100 tubes grow simultaneously with the actin network (Fig. 3, C and D and Supplementary Fig.  
101 3). An important observation is that there is a distribution of tube lengths within the actin  
102 network. Indeed, shorter tubes are present, since total fluorescence intensity decreases with  
103 distance from the liposome surface (Materials and Methods, Supplementary Fig. 4, A and B).  
104 Tubes shorter than the network thickness are clearly visible by confocal microscopy  
105 (Supplementary Fig. 4C).

106 The origin of the accumulation in membrane fluorescence detected at the tip of some of the  
107 longer tubes is unclear. We observe that SpVCA forms aggregates on membranes and sticks  
108 membranes together, even in the absence of actin (Supplementary Fig. 5). It is possible that  
109 small vesicles are attached via SpVCA to the membrane before polymerization starts and are  
110 pushed outward by actin growth. However, the presence of different tube lengths rules out  
111 that tubes could be only formed by pre-existing attached vesicles.

112

### 113 **Characterization of spikes**

114 We find that new actin is incorporated at the tips of the spikes as well as at the sides (Fig.  
115 4A), consistent with the localization of SpVCA (Fig. 4B). A clump of actin is observable at  
116 the base of the spikes (Fig. 4C). The thickness of the clump bears no clear correlation with  
117 the length of the spikes (Supplementary Fig. 6A), but slightly correlates with their width  
118 (Supplementary Fig. 6B). Spikes initially elongate with time until polymerization slows  
119 down, the basal width of spikes, however, remains roughly constant over time (Fig. 4D and  
120 Supplementary Fig. 6C).

121

### 122 **Theoretical models for the growth of spikes and tubes**

123 To rationalize the occurrence of spike-like structures arising solely from a uniformly  
124 polymerizing actin network, we use analytical modeling and numerical Finite Element  
125 calculations to evaluate the conditions under which large-scale membrane deformations may  
126 develop due to actin polymerization. We first estimate the normal stress exerted by the  
127 polymerization of an actin network (Material and Methods for details). The actin network can  
128 be modeled as a viscoelastic material with an elastic behavior at short time and a viscous  
129 behavior at long time due to network rearrangement, the cross-over time being on the order of  
130  $10\text{ s}^{10-12}$ . We choose to focus on the viscous behavior as the growth of the network occurs on  
131 timescales of tens of minutes.

132 We model the growth of the actin network by imposing a uniform actin polymerization  
133 velocity  $v_p$  normal to the liposome membrane, a choice motivated by the dual color  
134 measurements in Fig. 4A. We solve the Stokes equation for the viscous gel polymerizing with  
135 a constant velocity normal to the liposome surface (Material and Methods). Actin  
136 polymerization on a flat membrane results in a uniform actin flow which does not generate  
137 any mechanical stress. A small perturbation of membrane shape modulates the actin velocity  
138 field which may generate viscous stress on the membrane. We show in the Material and  
139 Methods that the first order contribution to the normal stress exerted by the network on a  
140 periodically weakly deformed membrane, as illustrated in Fig. 5A, also vanishes identically.  
141 The lowest order contribution to the actin stress is quadratic with membrane deformation.  
142 This is in agreement with the finding that actin growing on a uniformly curved surface  
143 creates a normal stress proportional to the square of the curvature<sup>10,13</sup>. In the case of a  
144 localized membrane perturbation, a Gaussian with amplitude  $A$  and width  $b$ ,  
145  $u(x) = A \exp[-(x/b)^2]$  (Fig. 5B), we numerically calculate the normal stress exerted by an  
146 actin layer (Material and Methods). We obtain the pressure and velocity fields that arise in  
147 the actin layer (Fig. 5C). Velocity gradients in the growing actin layer, generated by the

148 deformed surface, induce a normal force in the center of the perturbation, “pushing” the  
149 membrane inwards in the center of the perturbation (Fig. 5D). A scaling analysis of the  
150 Stokes equation, confirmed by our numerical calculation, shows that the normal stress  $\sigma_{nm}$ , at  
151 the center of the perturbation ( $x=0$ ) scales as  $\sigma_{nm} \sim -\eta A^2 b^{-3} v_p$ , where  $\eta$  is the viscosity of  
152 the actin layer (Fig.5, E and F). It is important to realize that the normal stress exerted by the  
153 actin network on the membrane, when integrated over the area that surrounds the  
154 deformation, amounts to a zero net force. This contrasts with existing models of filopodia  
155 formation, which usually consider bundled actin filaments exerting a net pushing force on the  
156 membrane<sup>14</sup>, invoking the friction force of treadmilling actin filament on the cellular actin  
157 cortex to balance this pushing force<sup>15</sup>. While the latter approach might be appropriate to  
158 explain the physics of filopodia filled with bundled actin, here, we do not *a priori* distinguish  
159 the detailed structure of the actin network at the membrane from the one in the protrusion,  
160 treating the actin network as a continuum.

161 The normal stress, on a deformable surface, is in our case balanced by the restoring elastic  
162 stress  $\sigma_{memb}$  due to membrane elasticity. Neglecting the contribution of the membrane  
163 bending rigidity  $\kappa$  for simplicity, this stress corresponds to the membrane Laplace  
164 pressure  $\sigma_{memb} = -\gamma C$ , where  $\gamma$  is the membrane tension and  $C \sim A/b^2$  the local curvature  
165 (evaluated at the center of the localized perturbation). The balance of actin polymerization  
166 and membrane stresses defines a threshold amplitude  $A^* = \gamma b / (\eta v_p)$ . When the amplitude of  
167 the perturbation is smaller than this threshold ( $A < A^*$ ) the membrane stress dominates and  
168 the perturbation relaxes. Above the threshold ( $A > A^*$ ) the force exerted by the network is  
169 dominant and the instability develops. For  $\gamma \approx 10^{-6} N/m$ <sup>16</sup>,  $\eta \approx 10^4 Pa s$  (obtained through  
170 a scaling law from the elastic modulus  $E$  of the network and the viscoelastic time scale  
171  $\tau_{ve}$  as  $\eta \approx E \tau_{ve}$ , where the elastic modulus  $E \approx 10^3 Pa$ <sup>17</sup> and the viscoelastic timescale  
172  $\tau_{ve} \approx 10 s$ <sup>11,12</sup>) and  $v_p \approx 10^{-9} m/s$ , the critical amplitude of a perturbation with a width  $b \approx$

173  $10^{-7}m$  is found to be  $A^* \approx 10^{-8}m$ . To evaluate whether such a perturbation could be  
174 reached by thermal fluctuations, the average membrane roughness corresponding to the  
175 fluctuation of a free membrane at thermal equilibrium is estimated as follows. With  $\xi$  the  
176 mesh size of the network, identifying  $(A/b)^2$  with the thermal average of the gradient of the  
177 membrane shape  $\langle |\nabla h|^2 \rangle \sim \frac{kT}{2\pi\kappa} \log\left(\frac{4\pi^2\kappa}{\xi^2\gamma}\right)$ <sup>18</sup> and integrating over all wavelengths superior  
178 to the mesh size, we find a threshold tension for the appearance of spikes:  $\gamma < \gamma^* =$   
179  $\eta v_p \sqrt{kT/(2\pi\kappa)} \approx 2 \times 10^{-6} N/m$ . This value is in the range of membrane tension for  
180 liposomes under control conditions (*i.e.* non-deflated liposomes), but is larger than the  
181 tension of deflated liposomes, leading to the prediction that deflated liposomes are prone to  
182 the formation of spikes. In agreement with our experiments, the occurrence of spikes in non-  
183 deflated conditions (8.4%, Fig.1 C) is significantly lower than in deflated conditions (65.0%,  
184 Fig. 1C). A decrease of membrane tension has therefore a major influence on spike initiation.  
185  
186 We now develop a model for tube initiation. We consider a membrane deformation consisting  
187 of a very thin membrane tube connected to a flat membrane. The force required to pull a tube  
188 depends on membrane bending rigidity  $\kappa$  and membrane tension  $\gamma$  through  $f_{tube} = 2\pi\sqrt{2\kappa\gamma}$  ,  
189 as extensively studied both theoretically and experimentally<sup>19,20</sup>. Taking the bending energy  
190 of  $10 kT$  and a membrane tension of  $\gamma \sim 10^{-6} N/m$ <sup>16</sup>, we find  $f_{tube} \sim 2$  pN. For the dynamic  
191 actin network to be able to pull a membrane tube, the tube force must be balanced by the  
192 mechanical stress in the growing network. Transient attachments between the membrane and  
193 the network exist when an actin filament is bound to the activator pVCA, as characterized  
194 experimentally<sup>21</sup>. The growth of the actin network exerts a pulling force on this attachment  
195 site that can pull a membrane tube. Upon detachment, the tube retracts until one of the  
196 binding sites alongside the tube reaches the tube end, thus taking turn on the extraction force



197 (Fig. 6A). This effectively results in the network exerting a long-lived localized force on the  
198 membrane, for times longer than the viscoelastic relaxation time, supporting a viscous  
199 description of the actin layer (Supplementary Information).

200 The drag force exerted by the actin network (moving away from the liposome surface at a  
201 velocity  $v_p$ ) on the tip of the tube (moving at a velocity  $\dot{L}$ ) can be crudely estimated using the  
202 Stokes law:  $f_{drag} = 6 \pi \eta r_{tube} (v_p - \dot{L})$  (Fig. 6B). At steady-state, the drag force balances the  
203 tube force, which provides the tube extraction velocity,  $\dot{L} = v_p \left(1 - \frac{f_{tube}}{6 \pi \eta r_{tube} v_p}\right)$ . Tube  
204 extraction ( $\dot{L} > 0$ ) is therefore possible provided

$$205 \quad \gamma \xi^4 < \frac{3}{2} k_B T l_p v_p \tau_{ve} \quad \text{Eq.1}$$

206 where we have used that  $\eta \approx E \tau_{ve} \approx k_b T l_p \tau_{ve} / \xi^4$ <sup>22</sup> (Fig. 6C). While a large enough  
207 membrane tension can in principle prevent tube extraction, the range of tension explored  
208 experimentally yields  $6 \pi \eta r_{tube} v_p = \frac{3 \eta v_p}{2 \gamma} f_{tube} \approx 10 f_{tube}$  (with  $v_p = 1 \text{ nm/s}$ ,  $\eta = E \tau_{ve} \approx$   
209  $10^4 \text{ Pa} \cdot \text{s}$  and  $\gamma \sim 10^{-6} \text{ N/m}$ ). Consequently, we find that membrane tubes can always be  
210 extracted by the growing actin network under the present conditions. Tube extraction  
211 however could in principle be prevented under high tension, or for a loose network (high  
212 value of the actin meshsize  $\xi > 100 \text{ nm}$ ). However, these regimes could not be explored due  
213 to experimental limitations of network growth under such conditions<sup>23</sup>. Moreover the tube  
214 extraction velocity is very close to the actin polymerization velocity ( $\dot{L} \gtrsim 0.9 v_p$ ). This  
215 explains why tubes initiated early during actin growth actually span the entire actin layer. The  
216 distribution in tube lengths inferred from Supplementary Fig. 4 can originate either from a  
217 distribution of tube nucleation time during the growth of the network or a distribution of  
218 rebinding time during tube retraction following a detachment from the actin network.

219

220 In yeast, actin is absolutely required for endocytosis, likely because of the high turgor  
221 pressure that opposes inward membrane deformations<sup>24-26</sup>. The force needed to overcome the  
222 turgor pressure can reach 1000 pN<sup>27</sup>, almost three orders of magnitude larger than the actin  
223 force in our *in-vitro* conditions. Using actin dynamics parameters relevant for yeast  
224 (polymerization velocity  $v_p = 50\text{nm/s}$ <sup>1</sup> and actin network viscosity  $\eta = 2 \cdot 10^5 \text{Pa} \cdot \text{s}$ <sup>28</sup>), the  
225 drag force generated by the actin network may indeed create the force required for membrane  
226 deformation leading to endocytosis (Supplementary Information).

227

## 228 **Discussion**

229 The cell is a robust system where redundant mechanisms insure proper function, which  
230 makes detailed cell mechanisms difficult to decipher. This is true for membrane deformations  
231 into filopodia<sup>5</sup> or endocytic intermediates<sup>1</sup>. Here, we show that a branched actin network  
232 growing at a membrane is able to mimic the initiation of either an endocytosis-like or a  
233 filopodia-like deformation. Endocytosis-like deformations appear to be a robust feature with  
234 regard to membrane tension whereas the initiation of filopodia-like structures is eased by a  
235 decreased membrane tension. Our results support recent findings that the initiation of  
236 dendritic filopodia and endocytosis primarily relies on the growth of a branched actin  
237 network<sup>1,3,5</sup>.

238 Endocytosis is intimately dependent on the existence of a physical link between the actin  
239 network and the plasma membrane in yeast as well as in mammalian cells under high tension.  
240 Controlled endocytosis is abolished in yeast if this link is suppressed, although already  
241 endocytosed vesicles retain their extraordinary capacity to polymerize actin and even undergo  
242 actin-based motility<sup>3,29</sup>. In our reconstituted system, in which actin nucleators are  
243 permanently linked to the liposome membrane, actin dynamics alone have the remarkable

244 capacity to initiate endocytosis-like membrane deformations with a width smaller than, or of  
245 the order of, the actin mesh size.

246 A class of model for filopodia initiation assumes a particular actin organization in the  
247 protrusion, typically that of bundled actin filaments<sup>14,15,30,31</sup>. Supported by our dual color  
248 actin measurements, our model for spike initiation assumes that actin polymerization occurs  
249 uniformly at the membrane, which indicates that new actin is incorporated all along the  
250 conical membrane surface, and not only at the tip of the protrusion as observed in Liu<sup>32</sup>.

251 Decreasing the membrane tension of the liposome decreases the critical amplitude for spike  
252 nucleation and increases the likelihood of spike formation (Fig. 5). This suggests a  
253 mechanism of spike formation different from that of tip growing protrusions, both in its  
254 initiation, and in its subsequent growth dynamics. Spikes are mimics of filopodia, especially  
255 in the case of dendritic filopodia whose formation relies on the Arp2/3 complex-branched  
256 network<sup>5</sup>, as the suppression of the Arp2/3 complex system decreases the number of  
257 dendritic protrusions<sup>33</sup>.

258

## 259 **Materials and Methods**

### 260 **1. Reagents, lipids, proteins**

261 Chemicals are purchased from Sigma Aldrich (St. Louis, MO, USA) unless specified  
262 otherwise. L-alpha-phosphatidylcholine (EPC), 1,2-distearoyl-sn-glycero-3-  
263 phosphoethanolamine-N-[biotinyl polyethylene glycol 2000] (biotinylated lipids), 1,2-  
264 dioleoyl-sn-glycero-3- [[N(5-amino-1-carboxypentyl)iminodiacetic acid]succiny] nickel salt  
265 (DOGS-NTA-Ni) are purchased from Avanti polar lipids (Alabaster, USA). Texas Red® 1,2-  
266 dipalmitoyl-sn-glycero-3-phosphocholine, triethylammonium salt is from Thermofisher.  
267 Actin is purchased from Cytoskeleton (Denver, USA) and used with no further purification.  
268 Fluorescent Alexa-488 actin and Alexa546 actin are obtained from Molecular Probes

269 (Eugene, Oregon, USA). Porcine Arp2/3 complex is purchased from Cytoskeleton and used  
270 with no further purification. Biotin is purchased from Sigma-Aldrich (St. Louis, Missouri,  
271 USA), diluted in DMSO. Mouse  $\alpha$ 1 $\beta$ 2 capping protein is purified as in <sup>34</sup>. Untagged human  
272 profilin and SpVCA are purified as in <sup>7</sup>. SpVCA is fluorescently labeled on the N-terminal  
273 amine with Alexa546 at pH 6.5 for 2 h at 4°C, desalted and then purified on a Superdex 200  
274 column. His-pVCA-GST (GST-pVCA) is purified as for PRD-VCA-WAVE <sup>35</sup> and His-  
275 pVCA is essentially the same without the glutathione sepharose step. A solution of 30  $\mu$ M  
276 monomeric actin containing 15% of labeled Alexa-488 actin is obtained by incubating the  
277 actin solution in G-Buffer (2 mM Tris, 0.2 mM CaCl<sub>2</sub>, 0.2 mM DTT, pH 8.0) overnight at  
278 4°C. All proteins (SpVCA, profilin, CP, actin) are mixed in the isotonic or hypertonic  
279 working buffer. The isotonic working buffer contains 25 mM imidazol, 70 mM sucrose, 1  
280 mM Tris, 50 mM KCl, 2 mM MgCl<sub>2</sub>, 0.1 mM DTT, 1.6 mM ATP, 0.02 mg/mL  $\beta$ -casein,  
281 adjusted to pH 7.4. The hypertonic working buffer differs only by its sucrose concentration  
282 and contains 25 mM imidazol, 320 mM sucrose, 1 mM Tris, 50 mM KCl, 2 mM MgCl<sub>2</sub>, 0.1  
283 mM DTT, 1.6 mM ATP, 0.02 mg/mL  $\beta$ -casein, adjusted to pH 7.4. Osmolarities of the  
284 isotonic and hypertonic working buffers are respectively 200 and 400 mosmol, as measured  
285 with a Vapor Pressure Osmometer (VAPRO 5600). In case of experiments with DOGS-  
286 NTA-Ni lipids, all proteins are diluted in a working buffer containing 280 mM glucose, 10  
287 mM HEPES, 0.5 mM DABCO, 100 mM KCl, 4 mM MgCl<sub>2</sub>, 1 mM DTT, 10 mM ATP and  
288 0.05 mg/mL  $\beta$ -casein.

289

## 290 **2. Liposome preparation**

291 Liposomes are prepared using the electroformation technique. Briefly, 10  $\mu$ l of a mixture of  
292 EPC lipids, 0.1% biotinylated lipids or 5% DOGS-NTA-Ni lipids, and 0.1% TexasRed lipids  
293 with a concentration of 2.5 mg/ml in chloroform/methanol 5:3 (v/v) are spread onto indium

294 tin oxide (ITO)-coated plates under vacuum for 2 h. A chamber is formed using the ITO  
295 plates (their conductive sides facing each other) filled with a sucrose buffer (0.2 M sucrose, 2  
296 mM Tris adjusted at pH 7.4) and sealed with hematocrit paste (Vitrex Medical, Denmark).  
297 Liposomes are formed by applying an alternate current voltage (10 Hz, 1 V) for 2 h.  
298 Liposomes are then incubated with an activator of actin polymerization (SpVCA, 350 nM)  
299 via a streptavidin-biotin link for 15 min. Isotonic liposomes are used right away for  
300 polymerizing actin in the isotonic working buffer. To obtain deflated liposomes, an extra step  
301 is added: they are diluted twice in the hypertonic working buffer at 400 mOsmol and  
302 incubated for 30 min. The final solution is therefore at 300 mOsmol.

### 303 **2bis. Biotin-blocking experiments**

304 SpVCA labeled with AlexaFluor546 and biotin are diluted in the isotonic working buffer and  
305 incubated for 10 min to reach final concentration of 350 nM SpVCA and various  
306 concentrations of biotin (87.5 nM, 175 nM, 262.5 nM, 350 nM). Note that 350 nM of biotin  
307 corresponds to a full saturation of the streptavidin sites of SpVCA. Unlabeled liposomes  
308 (99.9% EPC lipids, 0.1% biotinylated lipids) are then diluted twice in this solution and  
309 incubated for 15 min. Tubes and spikes are visualized by the fluorescence of SpVCA.

310

### 311 **3. Actin cortices with a branched network**

312 Condition 1: Actin polymerization is triggered by diluting the isotonic or deflated liposomes  
313 6 times in a mix of respectively isotonic or hypertonic working buffer containing final  
314 concentrations of 3  $\mu$ M monomeric actin (15% fluorescently labelled with AlexaFluor488), 3  
315  $\mu$ M profilin, 37 nM Arp2/3 complex, 25 nM CP. Note that the final concentrations of salt and  
316 ATP in both isotonic and hypertonic conditions are 0.3 mM NaCl, 41 mM KCl, 1.6 mM  
317 MgCl<sub>2</sub>, 0.02 mM CaCl<sub>2</sub> and 1.5 mM ATP. Hypertonic conditions differ from isotonic  
318 conditions by 250 mM sucrose.

319 Condition 2: Same protocol as in Condition 1 with unlabeled monomeric actin, unlabeled  
320 liposomes (99.9% EPC lipids, 0.1% biotinylated lipids) and SpVCA labeled with  
321 AlexaFluor546.  
322 In Figure 1, panel C, non-deflated liposomes n=311 are distributed as follows: 215 from 3  
323 experiments in Condition 1 and 96 from 2 experiments in Condition 2. Deflated liposomes n=123  
324 are distributed as follows: 92 from 2 experiments in Condition 1 and 31 from one experiment  
325 in Condition 2.

326

#### 327 **4. Photo-damage of the actin network**

328 The actin network area to photo-damage is defined with a diaphragm. The area is illuminated  
329 for 15 s with a Hg lamp and a FITC filter cube and the illumination is repeated until actin is  
330 completely destroyed or at least no longer detectable by eye.

331

#### 332 **5. Two color experiment**

333 Liposomes are first incubated with 350 nM SpVCA for 15 min. This solution is then diluted  
334 3-fold into a mix of isotonic buffer containing 3  $\mu$ M actin (15% Alexa568-labeled, red), 37  
335 nM Arp2/3 complex and 25 nM CP. After 20 min of incubation in these conditions, the  
336 solution is diluted 3 times in a mix of same protein concentrations containing 15% Alexa488-  
337 labeled actin, green.

338

#### 339 **6. Cryo-electron microscopy**

340 To prepare small liposomes, a mixture of EPC lipids and 0.1% biotinylated lipids with a  
341 concentration of 1 mg/mL in chloroform/methanol 5:3 (v/v) is dried and resuspended under  
342 vortexing in a buffer containing 25 mM imidazol, 1 mM Tris, 50 mM KCl, 2 mM MgCl<sub>2</sub>, 0.1  
343 mM DTT, 1.6 mM ATP, 0.02 mg/mL  $\beta$ -casein. Liposomes are then incubated with SpVCA

344 (350 nM) for 15 min and finally flash-frozen for cryo-electron microscopy. Images were  
345 recorded under low dose conditions with a Tecnai G2 Lab6 electron microscope operating at  
346 200 kV with a TVIPS F416 4K camera and with a resolution of 0.21 Å/pixel.

347

## 348 **7. Observation of liposomes**

349 *Observation in 2D*: epifluorescence (GFP filter cube, excitation 470 nm, emission 525 nm;  
350 Texas red filter cube: excitation 545-580 nm, emission 610 nm-IR), phase contrast and  
351 bright-field microscopy are performed using an IX70 Olympus inverted microscope with a  
352 100x or a 60x oil-immersion objective. Images are collected by a charge coupled device CCD  
353 camera (CoolSnap, Photometrics, Roper Scientific).

354 *Observation in 3D*: confocal and bright-field microscopy are performed using an inverted  
355 Confocal Spinning Disk Roper/Nikon with a 100x or a 60x oil-immersion objective and  
356 lasers with wavelengths of 491 nm for actin and 561 nm for lipids. A FITC filter cube  
357 (excitation filter: 478-495 nm/emission filter: 510-555 nm) and a TxRed filter cube  
358 (excitation filter: 560-580 nm/emission filter: 600-650 nm) are used to acquire respectively  
359 actin and lipids fluorescence. Images are collected by a charge coupled device CCD camera  
360 (CoolSnap HQ2, Photometrics, Roper Scientific).

361 *3D data*: Z-stacks are acquired using the software Metamorph on each wavelength with a z-  
362 interval of 0.5 µm.

363

## 364 **8. Image analyses of liposomes, tubes and spikes**

365 *Image analyses* are performed with ImageJ software and data are processed on Matlab. The  
366 thickness of the actin network and the length of tube membranes is obtained from  
367 fluorescence intensity profiles (Fig. 3A). The first peak of the membrane profile determines  
368 the liposome surface, the actin network thickness is the distance between this peak and the

369 half width at half maximum of the actin fluorescence profile. The length of the membrane  
370 tubes is obtained as the peak-to-peak distance of the membrane fluorescence profile. The size  
371 of spikes (length, width) and actin network is determined by the corresponding positions of  
372 the inflexion points. Fluorescence profiles in each case (membrane, actin) are fitted with a  
373 polynomial function. The first maximum and the second minimum of the fit derivative,  
374 corresponding to inflexion points of the profile, determine the membrane or actin edges. The  
375 size is then the distance between the two edges. From actin fluorescence profile, actin  
376 network thickness at the base of spike is defined as the distance between the first maximum  
377 and first minimum of the fit derivative.

378 *To determine whether shorter tubes are present* in addition to the easily visualized long ones,  
379 we measure the total fluorescence intensity of the membrane on an arc that is displaced along  
380 a radial axis  $r$  from close to the liposome surface to the external part of the network. We  
381 hypothesize that tubes maintain a constant diameter along their length, as is established for  
382 pure membrane tubes<sup>19</sup>. In these conditions, if all tubes have the same length, the total  
383 intensity should show a plateau as a function of  $r$ , until falling off to zero at an  $r$  where there  
384 are no more tubes (Supplementary Fig. 4A). Conversely, the total intensity would decrease  
385 as a function of  $r$  if tubes of different lengths were present (Supplementary Fig. 4A).

386

## 387 **9. Statistical analyses**

388 All statistical analyses are performed using MedCalc software. N-1 Chi-squared test is used  
389 to determine the statistical significance. Differences among samples were considered  
390 statistically significant when  $p < 0.05$ .

391

## 392 **10. Theoretical model for spike initiation**



393 To calculate the stress exerted by a viscous network, polymerizing at a curved surface we  
394 consider an incompressible stokes flow, described by force balance and incompressibility,  
395 i.e.,  $\vec{\nabla} \cdot \vec{\sigma} = 0$  and  $\vec{\nabla} \cdot \vec{v} = 0$ , where  $\vec{v}$  is the velocity of the gel and  $\vec{\sigma}$  is the viscous stress in  
396 Cartesian coordinates, given by,  $\sigma_{ij} = -p \delta_{ij} + \eta \left( \frac{\partial v_i}{\partial x_j} + \frac{\partial v_j}{\partial x_i} \right)$ . Polymerization of the actin  
397 network is encoded in this model by imposing the velocity of the network, normal to the  
398 surface of the curved interface. Moreover, we impose a stress free boundary condition at the  
399 outer layer, both for the normal as well as the tangential stress, i.e.,  $\sigma_{nn} = 0$  and  $\sigma_{nt} = 0$ .  
400 Note that, in the limit we consider, an infinite thick network, this corresponds to a uniform  
401 velocity in the z-direction.

402

403 We determine the first order correction of the normal stress on a deformed surface  
404 characterized by  $u(x) = u_0 \exp(iqx)$  along the  $x$  axis ( $u_0$  is the deformation amplitude and  $q$   
405 the wave vector, Fig. 5A). We seek a solution for the velocity field within the network of the  
406 form  $v_j = v_j(z) \exp(iqx)$ , where the index  $j$  represents the coordinate  $x$  or  $z$ , and a pressure  
407 field of the form  $p = p(z) \exp(iqx)$ . Assuming that the network grows normal to the surface,  
408 the first order correction of the  $x$ -component of the velocity field satisfies the boundary  
409 condition  $\delta v_x(z=0) = -v_p \partial_x u(x)$  at the interface ( $z=0$ ). We assume here a network of  
410 large thickness and require that the first order correction to the velocity vanishes at  $z \rightarrow \infty$ .  
411 The first order corrections to the velocity and pressure in the network read  $\delta v_x(z) =$   
412  $-iqu_0(1 - qz)v_p \exp(-qz)$ ,  $\delta v_z(z) = -q^2 u_0 v_p z \exp(-qz)$  and  $\delta p(z) =$   
413  $-2 \eta q^2 u_0 v_p \exp(-qz)$ . At this order the actin normal stress turns out to vanish at any point  
414 of the liposome surface:  $\sigma_{nn}(x, z=0) = 2\eta \partial_z v_z - p = 0$ . This implies that the membrane is  
415 linearly stable against small deformations in the presence of a growing actin network.

416 The second-order correction for the actin stress is in principle difficult to calculate, as the  
417 different modes of deformation are coupled. An analytical estimate can be obtained by  
418 expanding the surface normal vector up to second order, which yields the following scaling  
419 for the normal stress at the liposome surface,  $\sigma_{nn} \propto -\eta q^3 u_0^2 v_p$ . This weakly non-linear  
420 analysis reveals that there is a non-zero normal stress acting on the membrane, which we will  
421 later compare with the membrane contribution to address system stability.

422 In order to get a numerical solution for the normal stress in a "localized" spike-like  
423 perturbation on the interface, as opposed to the periodic one presented above, we use a Finite  
424 Element Method from *Mathematica* with default settings. We implement a geometry as  
425 described in Fig. 5B, where the lower surface is parametrized with a Gaussian deformation as  
426 mentioned before, i.e.,  $u(x, z) = z - A \exp\left(-\left(\frac{x}{b}\right)^2\right) = 0$  and we choose the height of the  
427 system to be much larger than the extend and amplitude of the perturbation ( $h = 2\mu\text{m}$ ). Note  
428 that here,  $b$ , the characteristic lateral length of the localized perturbation, is related to the  
429 wavenumber  $q \sim 1/b$  used for the linear analysis. To account for a constant polymerization,  
430 perpendicular to the lower surface we impose the velocity on the lower surface, i.e.,  
431  $\partial v(u(x, z) = 0) = v_p(\partial_x u(x, z)\hat{x} + \partial_z u(x, z)\hat{z})$ , where  $v_p$  is the normalized polymerization  
432 velocity and a vanishing normal and tangential stress at the upper boundary  $z = h$ ,  
433 i.e.,  $\sigma_{nn}(z = h) = 0$  and  $\sigma_{nt}(z = h) = 0$ . Using this approach we could find the same  
434 scaling with amplitude and width of the perturbation, as found for the weakly non-linear  
435 analysis for a sinusoidal perturbation. Note also that here, by imposing the normal velocity at  
436 the interface, a choice that is motivated by the dual color images in Fig. 4A, we do not  
437 impose the tangential stress on the membrane, and hence this stress has to be balanced by an  
438 in-plane viscous stress in the membrane, which at this stage we do not model. These FEM  
439 simulations allow us to visualize the velocity field as well as the pressure throughout the

440 network, indicating the increase in pressure inside the local perturbation caused by the local  
441 convergence of the velocity fields (Fig. 5C).

442

#### 443 **References**

- 444 1 Kukulski, W., Schorb, M., Kaksonen, M. & Briggs, J. A. Plasma membrane reshaping  
445 during endocytosis is revealed by time-resolved electron tomography. *Cell* **150**, 508-  
446 520, doi:10.1016/j.cell.2012.05.046 (2012).
- 447 2 Picco, A., Mund, M., Ries, J., Nedelec, F. & Kaksonen, M. Visualizing the functional  
448 architecture of the endocytic machinery. *Elife* **4**, doi:10.7554/eLife.04535 (2015).
- 449 3 Picco, A. *et al.* The contributions of the actin machinery to endocytic membrane  
450 bending and vesicle formation. *bioRxiv*, doi:10.1101/172072 (2017).
- 451 4 Boulant, S., Kural, C., Zeeh, J. C., Ubelmann, F. & Kirchhausen, T. Actin dynamics  
452 counteract membrane tension during clathrin-mediated endocytosis. *Nat Cell Biol* **13**,  
453 1124-1131, doi:10.1038/ncb2307 (2011).
- 454 5 Korobova, F. & Svitkina, T. Molecular architecture of synaptic actin cytoskeleton in  
455 hippocampal neurons reveals a mechanism of dendritic spine morphogenesis. *Mol*  
456 *Biol Cell* **21**, 165-176, doi:10.1091/mbc.E09-07-0596 (2010).
- 457 6 van der Gucht, J., Paluch, E., Plastino, J. & Sykes, C. Stress release drives symmetry  
458 breaking for actin-based movement. *Proc Natl Acad Sci U S A* **102**, 7847-7852  
459 (2005).
- 460 7 Carvalho, K. *et al.* Actin polymerization or myosin contraction: two ways to build up  
461 cortical tension for symmetry breaking. *Philos Trans R Soc Lond B Biol Sci* **368**,  
462 20130005, doi:10.1098/rstb.2013.0005 (2013).
- 463 8 Paluch, E., Piel, M., Prost, J., Bornens, M. & Sykes, C. Cortical actomyosin breakage  
464 triggers shape oscillations in cells and cell fragments. *Biophys J* **89**, 724-733 (2005).

- 465 9 Akin, O. & Mullins, R. D. Capping protein increases the rate of actin-based motility  
466 by promoting filament nucleation by the Arp2/3 complex. *Cell* **133**, 841-851,  
467 doi:10.1016/j.cell.2008.04.011 (2008).
- 468 10 Julicher, F., Kruse, K., Prost, J. & Joanny, J. F. Active behavior of the cytoskeleton.  
469 *Physics reports* **449**, 3-28 (2007).
- 470 11 Gardel, M. L. *et al.* Scaling of F-actin network rheology to probe single filament  
471 elasticity and dynamics. *Phys Rev Lett* **93**, 188102,  
472 doi:10.1103/PhysRevLett.93.188102 (2004).
- 473 12 Gardel, M. L., Kasza, K. E., Brangwynne, C. P., Liu, J. & Weitz, D. A. Chapter 19:  
474 Mechanical response of cytoskeletal networks. *Methods Cell Biol* **89**, 487-519,  
475 doi:10.1016/s0091-679x(08)00619-5 (2008).
- 476 13 Noireaux, V. *et al.* Growing an actin gel on spherical surfaces. *Biophys J* **78**, 1643-  
477 1654 (2000).
- 478 14 Mogilner, A. & Rubinstein, B. The physics of filopodial protrusion. *Biophys J* **89**,  
479 782-795, doi:10.1529/biophysj.104.056515 (2005).
- 480 15 Prost, J., Barbetta, C. & Joanny, J. F. Dynamical control of the shape and size of  
481 stereocilia and microvilli. *Biophys J* **93**, 1124-1133, doi:10.1529/biophysj.106.098038  
482 (2007).
- 483 16 Caorsi, V. *et al.* Cell-sized liposome doublets reveal active tension build-up driven by  
484 acto-myosin dynamics. *Soft Matter* **12**, 6223-6231, doi:10.1039/c6sm00856a (2016).
- 485 17 Marcy, Y., Prost, J., Carlier, M.-F. & Sykes, C. Forces generated during actin-based  
486 propulsion: a direct measurement by micromanipulation. *Proc. Natl. Acad. Sci. USA*  
487 **101**, 5993-5997 (2004).
- 488 18 Deserno, M. Fluid lipid membranes: from differential geometry to curvature stresses.  
489 *Chem Phys Lipids* **185**, 11-45, doi:10.1016/j.chemphyslip.2014.05.001 (2015).

- 490 19 Derenyi, I., Julicher, F. & Prost, J. Formation and interaction of membrane tubes.  
491 *Phys Rev Lett* **88**, 238101, doi:10.1103/PhysRevLett.88.238101 (2002).
- 492 20 Roux, A. *et al.* Role of curvature and phase transition in lipid sorting and fission of  
493 membrane tubules. *Embo J* **24**, 1537-1545, doi:10.1038/sj.emboj.7600631 (2005).
- 494 21 Smith, B. A. *et al.* Three-color single molecule imaging shows WASP detachment  
495 from Arp2/3 complex triggers actin filament branch formation. *Elife* **2**, e01008,  
496 doi:10.7554/eLife.01008 (2013).
- 497 22 Kroy, K. & Frey, E. Force-Extension Relation and Plateau Modulus for Wormlike  
498 Chains. *Phys Rev Lett* **77**, 306-309, doi:10.1103/PhysRevLett.77.306 (1996).
- 499 23 Kawska, A. *et al.* How actin network dynamics control the onset of actin-based  
500 motility. *Proc Natl Acad Sci U S A* **109**, 14440-14445, doi:10.1073/pnas.1117096109  
501 (2012).
- 502 24 Wang, X. & Carlsson, A. E. A master equation approach to actin polymerization  
503 applied to endocytosis in yeast. *PLoS Comput Biol* **13**, e1005901,  
504 doi:10.1371/journal.pcbi.1005901 (2017).
- 505 25 Carlsson, A. E. Membrane bending by actin polymerization. *Curr Opin Cell Biol* **50**,  
506 1-7, doi:10.1016/j.ceb.2017.11.007 (2017).
- 507 26 Aghamohammadzadeh, S. & Ayscough, K. R. Differential requirements for actin  
508 during yeast and mammalian endocytosis. *Nat Cell Biol* **11**, 1039-1042,  
509 doi:10.1038/ncb1918 (2009).
- 510 27 Dmitrieff, S. & Nedelec, F. Membrane Mechanics of Endocytosis in Cells with  
511 Turgor. *PLoS Comput Biol* **11**, e1004538, doi:10.1371/journal.pcbi.1004538 (2015).
- 512 28 Carlsson, A. E. & Bayly, P. V. Force generation by endocytic actin patches in  
513 budding yeast. *Biophys J* **106**, 1596-1606, doi:10.1016/j.bpj.2014.02.035 (2014).

- 514 29 Sun, Y. *et al.* Switch-like Arp2/3 activation upon WASP and WIP recruitment to an  
515 apparent threshold level by multivalent linker proteins in vivo. *Elife* **6**,  
516 doi:10.7554/eLife.29140 (2017).
- 517 30 Lan, Y. & Papoian, G. A. The stochastic dynamics of filopodial growth. *Biophys J* **94**,  
518 3839-3852, doi:10.1529/biophysj.107.123778 (2008).
- 519 31 Atilgan, E., Wirtz, D. & Sun, S. X. Mechanics and dynamics of actin-driven thin  
520 membrane protrusions. *Biophys J* **90**, 65-76, doi:10.1529/biophysj.105.071480  
521 (2006).
- 522 32 Liu, A. P. *et al.* Membrane induced bundling of actin filaments. *Nature Physics* **4**,  
523 789-793 (2008).
- 524 33 Hotulainen, P. *et al.* Defining mechanisms of actin polymerization and  
525 depolymerization during dendritic spine morphogenesis. *The Journal of Cell Biology*  
526 **185**, 323 (2009).
- 527 34 Palmgren, S., Ojala, P. J., Wear, M. A., Cooper, J. A. & Lappalainen, P. Interactions  
528 with PIP2, ADP-actin monomers, and capping protein regulate the activity and  
529 localization of yeast twinfilin. *J Cell Biol* **155**, 251-260, doi:10.1083/jcb.200106157  
530 (2001).
- 531 35 Havrylenko, S. *et al.* WAVE binds Ena/VASP for enhanced Arp2/3 complex-based  
532 actin assembly. *Molecular Biology of the Cell* **26**, 55-65, doi:10.1091/mbc.E14-07-  
533 1200 (2015).

534

### 535 **Acknowledgments**

536 We acknowledge Dr. Agnieszka Kawska at IlluScientia.com for the Fig.s. This work was  
537 supported by the French Agence Nationale pour la Recherche (ANR), grant ANR

538 09BLAN0283 and ANR 12BSV5001401, by Fondation pour la Recherche Médicale (FRM),

539 grant DEQ20120323737, by the LabEx CelTisPhyBio postdoctoral fellowship (ML), No.  
540 ANR-10-LBX-0038 part of the IDEX PSL NANR- 10-IDEX-0001-02 PSL, by Marie Curie  
541 Integration Grant PCIG12-GA-2012-334053, “Investissements d’Avenir” LabEx PALM  
542 (ANR-10-LABX-0039-PALM), ANR grant ANR-15-CE13-0004-03 and ERC Starting Grant  
543 677532. Our groups belong to the CNRS consortium CellTiss. This work was supported by  
544 grants from the French National Research Agency through the “Investments for the Future”  
545 (France-BioImaging, ANR-10-INSB-04), the PICT-IBiSA Institut Curie (Paris, France)

546

547 **Author contributions:** CS, RK and VC have equal contributions. CS, VC performed  
548 experiments, analyzed data. RK performed the development of theoretical models. AA and  
549 MAG, JM, AdC, DL, CC, JP contributed to experimental data, ML and JFJ contributed to the  
550 development of the model, PS and CS designed the research. All authors contributed to write  
551 the paper.

552

553 **Author information:** request for material should be addressed to PS and CS

554 [cecile.sykes@curie.fr](mailto:cecile.sykes@curie.fr).

555 **Figures**

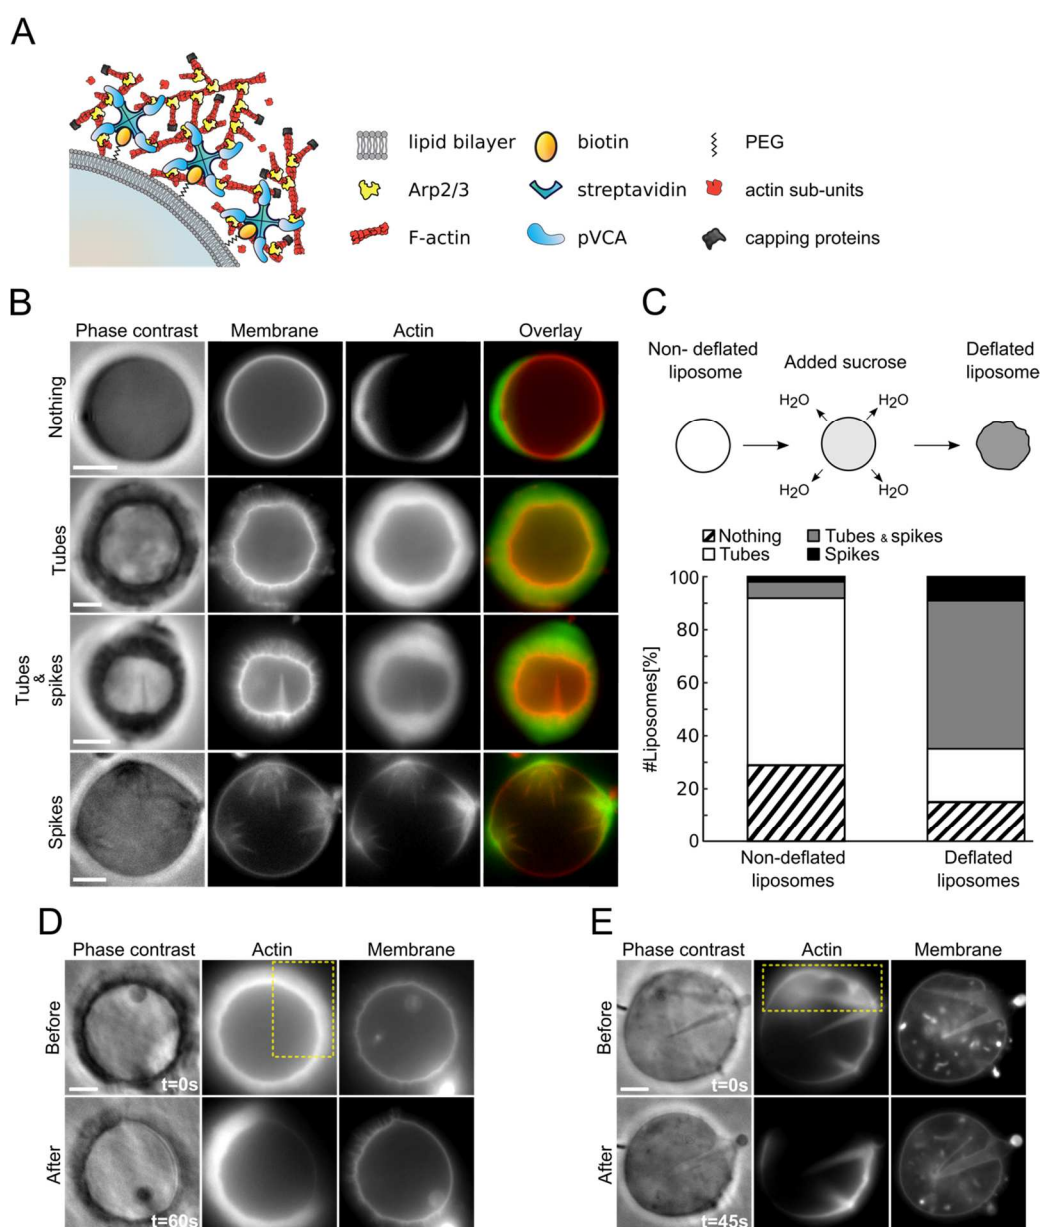

556 **Figure 1: Experimental system and observations**

557 (A) Scheme of the experimental system; proteins not to scale. (B) Membrane deformations in  
 558 both non-deflated (three first rows) and deflated conditions (last row). (C) Top: liposome  
 559 deflation. Bottom: number of liposomes displaying nothing, tubes, both tubes and spikes, and  
 560 only spikes. Non-deflated liposomes, n=311. Deflated liposomes, n=123. (D, E) Actin  
 561 network photo-damage (yellow dashed rectangle) on a liposome displaying membrane tubes  
 562 (D) or spikes (E). Phase contrast and epifluorescence microscopy of membrane and actin  
 563 network. Scale bars, 5 $\mu$ m.



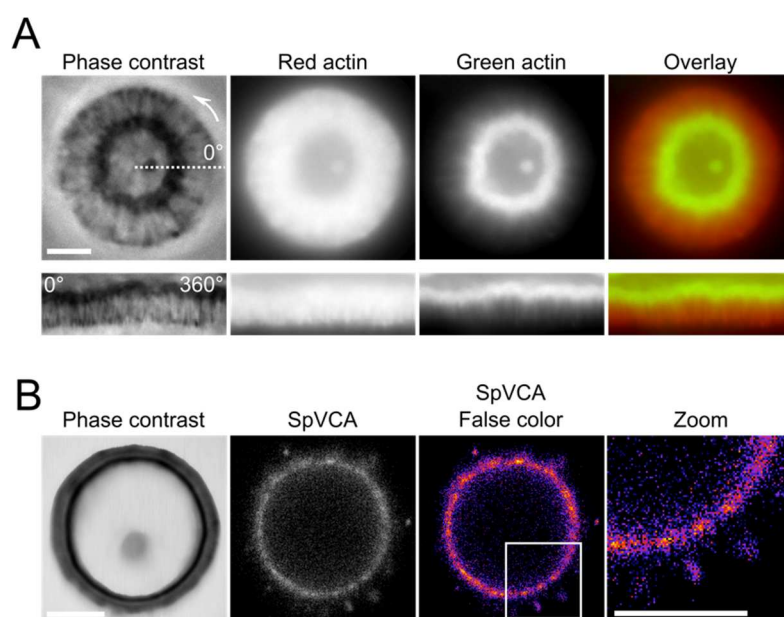

564 **Figure 2: Actin incorporation during tube formation**

565 (A) Top: a red actin network is grown for 20 minutes, then an excess of green actin is added,  
566 so green regions indicate newly polymerized actin. Bottom: corresponding polar plots. (B)  
567 Images of the activator of actin polymerization, SpVCA. False color image and zoom in  
568 (white rectangle). Phase contrast and epifluorescence microscopy of the actin network  
569 labeled with actin-Alexa568 (red) and actin-Alexa488 (green) in (A), and of SpVCA-  
570 Alexa546 in (B). Scale bars, 5 $\mu$ m.

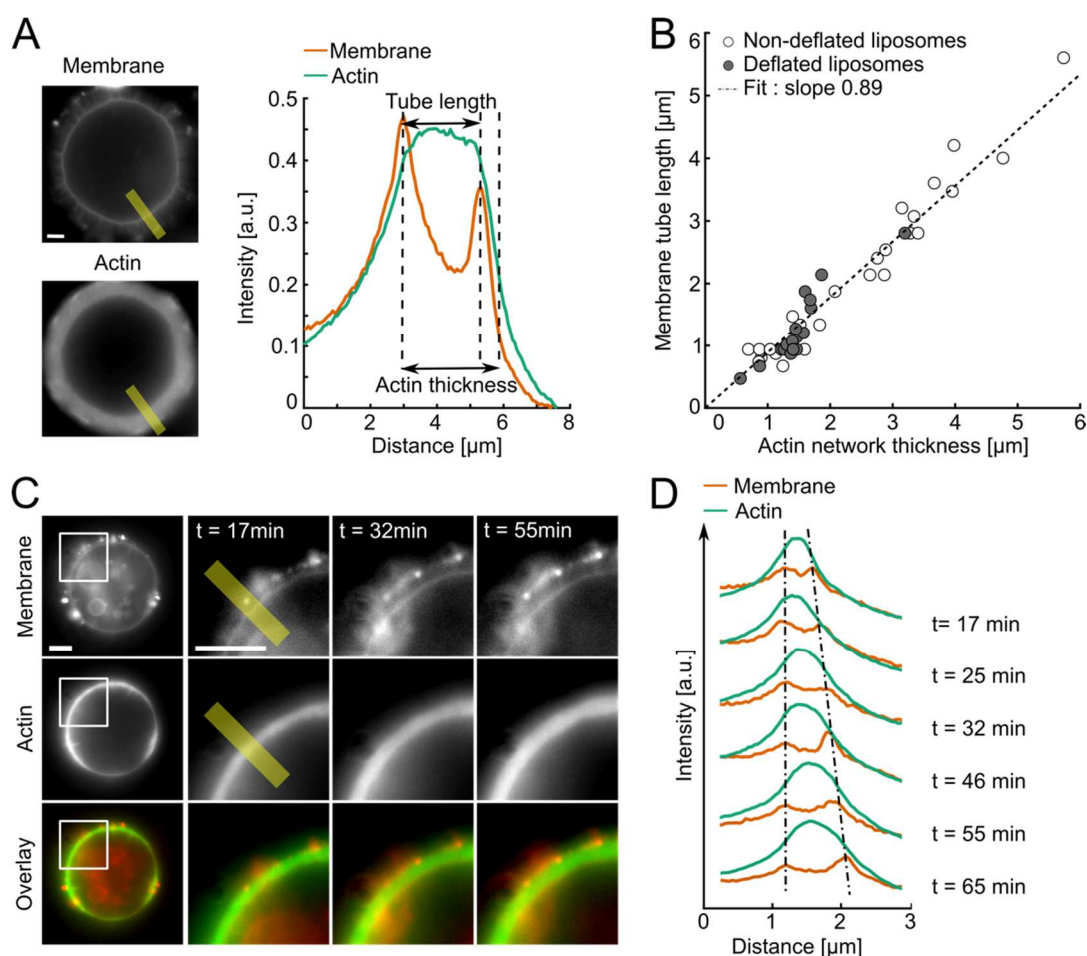

571 **Figure 3: Tube length compared to network thickness**

572 (A) Tube length and actin network thickness are measured from fluorescence intensity  
 573 profiles (thick yellow line) of the membrane (red) and the actin (green) channels (Materials  
 574 and Methods). (B) Tube length as a function of actin network thickness. White circles: non-  
 575 deflated liposomes. Grey circles: deflated liposomes. (C) Dynamics of tube growth (times  
 576 indicate elapsed time from the start of actin polymerization). (D) Fluorescence profile of the  
 577 thick yellow lines shown in (C). Membrane and actin fluorescence intensities plotted over  
 578 time (indicated). Other examples are shown in Supplementary Fig. 2. Epifluorescence  
 579 microscopy of membrane and actin. Scale bars,  $5\mu\text{m}$ .

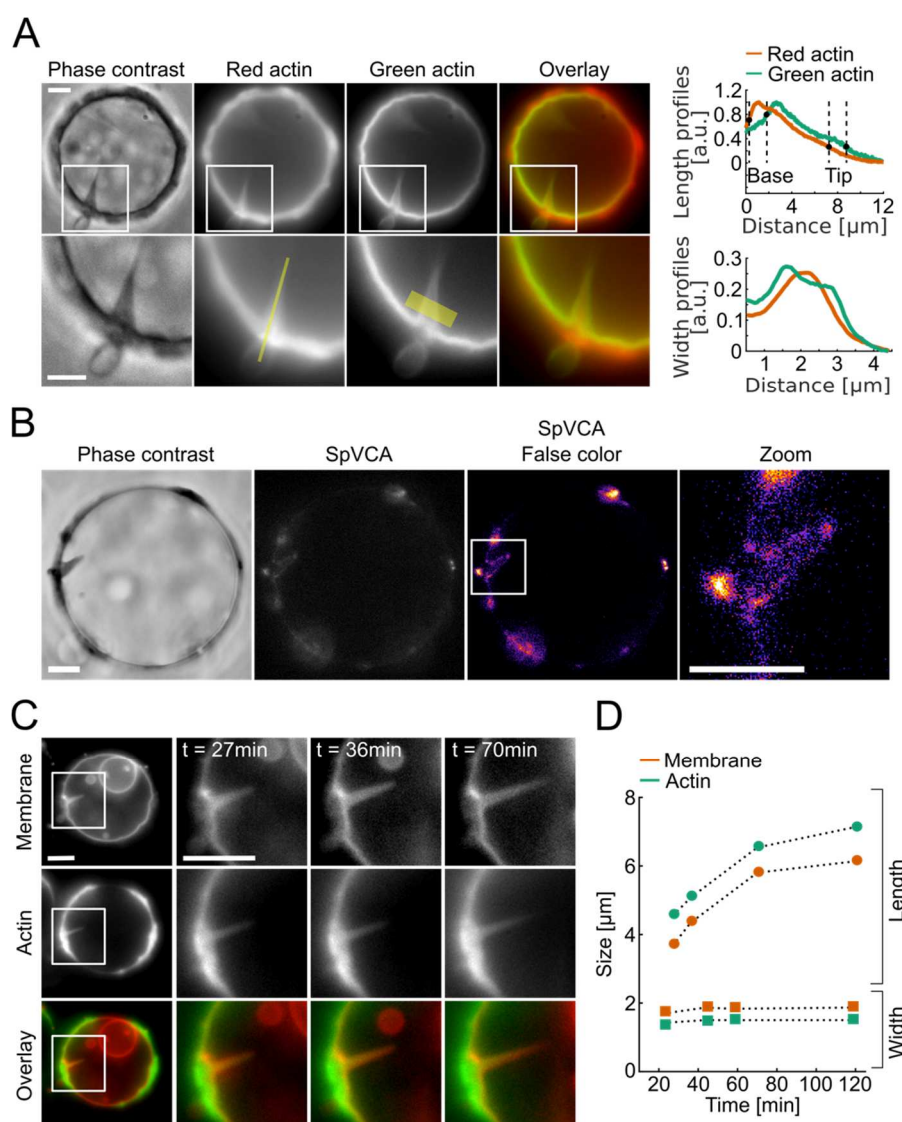

580 **Figure 4: Actin incorporation in spikes**

581 (A) Left: Two color experiment: green regions indicate newly polymerized actin. White  
 582 squares, zooms. Right: fluorescence intensity profiles spike length (top, thin yellow line on  
 583 zoomed image) and width (bottom, thick yellow line on zoomed image). (B) Activator of  
 584 actin polymerization, SpVCA. White rectangle, zoom. (C) Dynamics of spike growth (time  
 585 after actin polymerization starts). (D) Spike length and width over time, spike shown in C.  
 586 Other examples in Supplementary Fig. 5. Dashed lines, guides to the eyes. Phase contrast and  
 587 epifluorescence microscopy of the actin network (A), SpVCA-Alexa546 (B) membrane and  
 588 actin network (C). Scale bars, 5  $\mu\text{m}$ .

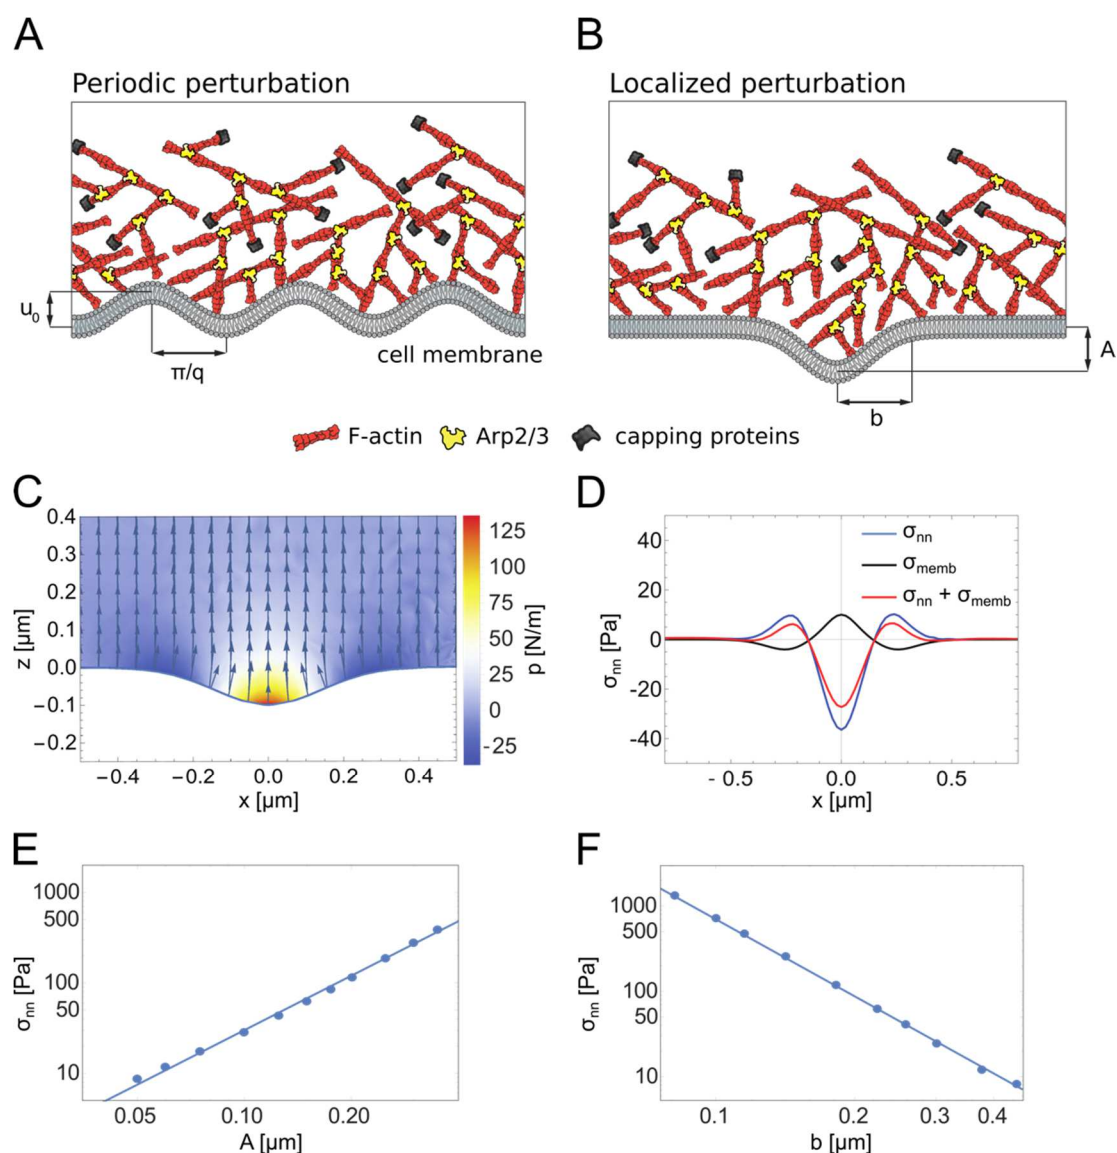

589 **Figure 5: Model for spike initiation**

590 Scheme of the initiation of a periodic (A) and localized (B) membrane deformation by the  
 591 growth of the actin network. (C) Velocity field of a viscous network polymerizing over a  
 592 membrane with a localized (gaussian) perturbation (amplitude  $A=0.1 \mu\text{m}$ , width  $b=0.2 \mu\text{m}$ ,  
 593 polymerization velocity  $v_p=1 \text{ nm/s}$ , viscosity  $\eta = 10^4 \text{ Pa}\cdot\text{s}$ ). Color, pressure in the network  
 594 layer. (D) Corresponding distribution of actin and membrane normal stresses ( $\sigma_{nn}$  and  $\sigma_{memb}$   
 595 respectively). (E, F) Scaling of  $\sigma_{nn}$  as function of the amplitude for a value of  $b = 0.22 \mu\text{m}$   
 596 (E) and width for a value of  $A=0.15 \mu\text{m}$  (F) of the perturbation ( $v_p= 1 \text{ nm/s}$ , viscosity  $\eta=10^4$   
 597  $\text{Pa}\cdot\text{s}$ ).

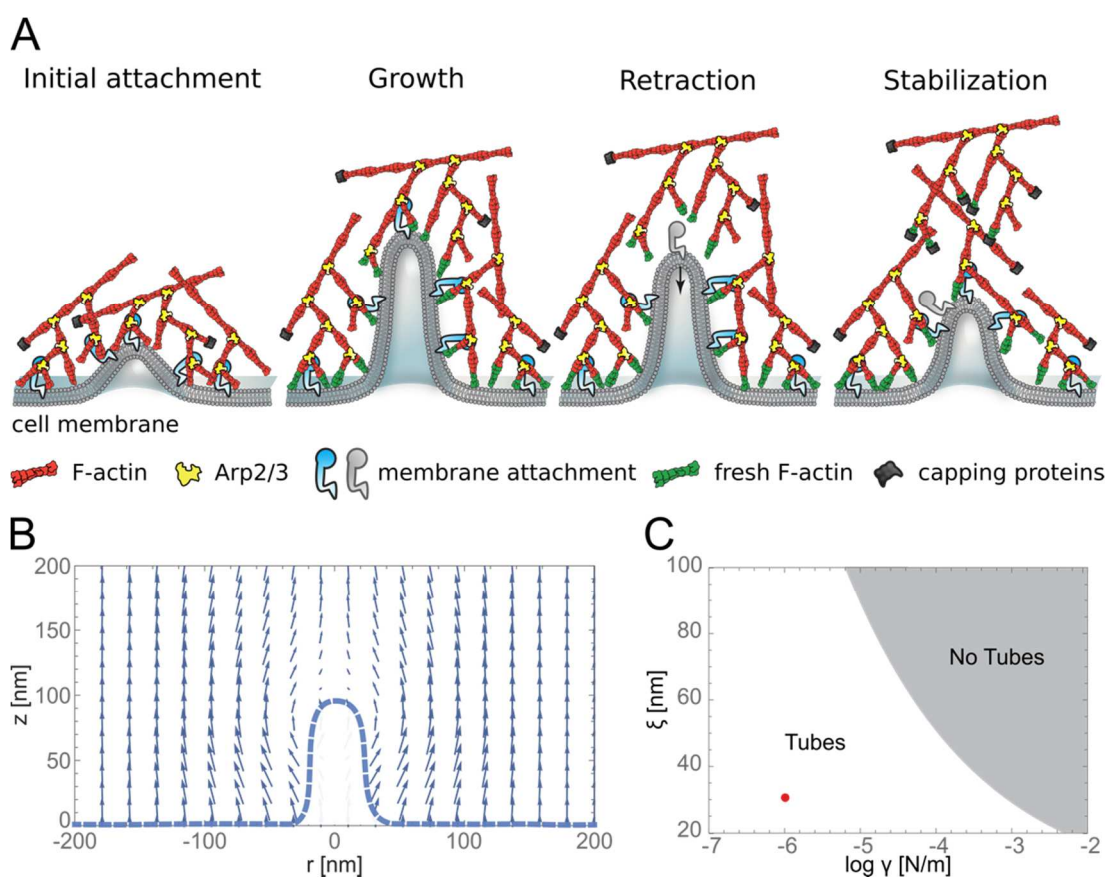

598 **Figure 6: Model for tube initiation**

599 (A) Scheme of a membrane tube pulled by the actin network and retraction due to  
 600 detachment. (B) Velocity field of the actin network pulling the membrane tube. We assume a  
 601 uniform polymerization  $v_p$  at the liposome surface and model the presence of the tube as a  
 602 disc with radius  $r_{tube} = 20 \text{ nm}$  and height  $h = 100 \text{ nm}$ . (C) Phase diagram, mechanics of  
 603 tube pulling as a function of mesh size  $\xi$  and membrane tension  $\gamma$ . Grey part, region where  
 604 the viscous driving force is not sufficient to extract a tube ( $f_{tube} = 2 \text{ pN}$ ,  $\kappa = 10kT$  and  $h =$   
 605  $140 \text{ nm}$ ). Red point, our experimental conditions.
